# Supplementary material
Source: ML conference proceedings conference paper supplement (https://openaccess.thecvf.com/content/ICCV2021/html/Yang_Deep_Co-Training_With_ICCV_2021_paper.html)
Supplement: Supplementary file 1 [file Yang_Deep_Co-Training_With_ICCV_2021_supplemental.pdf]

# Deep Co-Training with Task Decomposition for Semi-Supervised Domain Adaptation (Supplementary Material)

Luyu Yang<sup>1</sup>, Yan Wang<sup>2</sup>, Mingfei Gao<sup>3</sup>,  
Abhinav Shrivastava<sup>1</sup>, Kilian Q. Weinberger<sup>2</sup>, Wei-Lun Chao<sup>4</sup>, Ser-Nam Lim<sup>5</sup>

<sup>1</sup>University of Maryland <sup>2</sup>Cornell University

<sup>3</sup>Salesforce Research <sup>4</sup>Ohio State University <sup>5</sup>Facebook AI

We provide details omitted in the previous sections.

- **Appendix A:** additional details on experimental setups (cf. section 4 of the main paper).
- **Appendix B:** additional details on experimental results (cf. section 4 of the main paper).

## A. Experimental Setups

In section 5 of the main paper, we compare variants of our approach, including **MiST**, two-view **MiST**, and **DECOTA**. Here we give some more discussions. These three methods are different by 1) how many classifiers they train; 2) what labeled data they use; 3) which classifier provides the pseudo-labels. **Fig. 5** gives an illustrative comparison. **Fig. 4** illustrates the framework pipeline of **DECOTA**.

- **MiST** learns a single model  $w$ , using both labeled source data  $D_S$  and labeled target data  $D_T$ . **MiST** also updates  $w$  using pseudo-labels on the unlabeled target data  $D_U$ , where the pseudo-labels are predicted by the current  $w$ .
- **Two-view MiST** (*i.e.*, two-task **MiST**) learns two models,  $w_T$  and  $w_S$  (cf. subsection 3.2 of the main paper).  $w_T$  is updated using  $D_T$  and pseudo-labeled data on  $D_U$ , where the pseudo-labels are predicted by the current  $w_T$ .

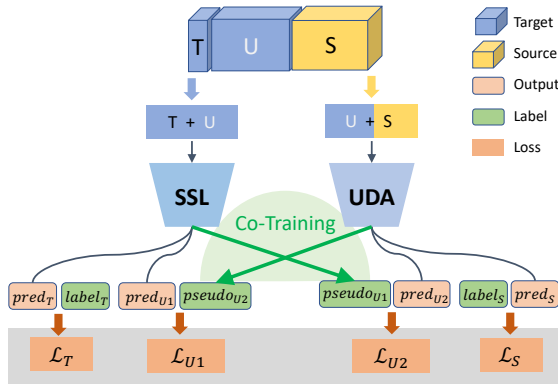

Figure 4: The overall framework of **DECOTA**. It decomposes the SSDA task into SSL and UDA tasks that exchange pseudo-labels for unlabeled target  $U$ .

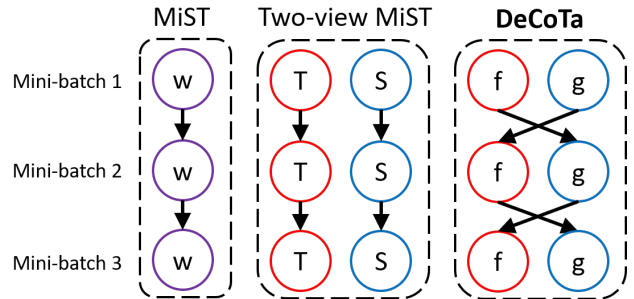

Figure 5: Comparison among **MiST**, two-view **MiST** (*i.e.*, two-task **MiST**), and **DECOTA**. The color on the circles means the labeled data: **red** for  $D_T$ , **blue** for  $D_S$ , and **purple** for both. The arrows indicate which model provides the pseudo-labels for which model to learn from.

- $w_S$  is updated using  $D_S$  and pseudo-labeled data on  $D_U$ , where the pseudo-labels are predicted by the current  $w_S$ .
- **DECOTA** learns two models,  $w_f$  and  $w_g$ .  $w_f$  is updated using  $D_T$  and pseudo-labeled data on  $D_U$ , where the pseudo-labels are predicted by the current  $w_g$ .  $w_g$  is updated using  $D_S$  and pseudo-labeled data on  $D_U$ , where the pseudo-labels are predicted by the current  $w_f$ .

**DECOTA** has two hyper-parameters: the confidence threshold  $\tau$  (cf. Equation 1 of the main paper) and  $\alpha$  in MIXUP (cf. Equation 2 of the main paper). We follow [51] to select these hyper-parameters using three other labeled examples per class in the target domain. Specifically, we only select hyper-parameters based on DomainNet three-shot setting, Real to Clipart. We then fix the selected hyper-parameters,  $\tau = 0.5$  and  $\alpha = 1.0$ , for all other experiments.

## B. Experimental Results

### B.1. Main results on the one-shot setting

We report the comparison with baselines in the one-shot setting on DomainNet in **Table 5** and Office-Home in **Table 6**. **DECOTA** outperforms the state-of-the-art methods by 4.9% on DomainNet (ResNet-34), while performs slightly worse than [45] by 0.6% on Office-Home (VGG-16). Neverthe-

Table 5: Accuracy on DomainNet (%) for the one-shot setting with four domains, using ResNet-34.

| Method        | R to C      | R to P      | P to C      | C to S      | S to P      | R to S      | P to R      | Mean        |
|---------------|-------------|-------------|-------------|-------------|-------------|-------------|-------------|-------------|
| S+T           | 58.1        | 61.8        | 57.7        | 51.5        | 55.4        | 49.1        | 73.1        | 58.1        |
| DANN [13]     | 61.2        | 62.3        | 56.4        | 54.0        | 57.9        | 55.9        | 65.6        | 59.0        |
| ENT [51]      | 60.0        | 60.2        | 54.9        | 48.3        | 55.8        | 49.4        | 74.4        | 57.6        |
| MME [51]      | 69.5        | 68.1        | 64.4        | 56.7        | 62.0        | 59.2        | 76.9        | 65.3        |
| UODA [45]     | 72.7        | 70.3        | 69.8        | 60.5        | 66.4        | 62.7        | 77.3        | 68.5        |
| APE [26]      | 70.4        | 70.8        | 72.9        | 56.7        | 64.5        | 63.0        | 76.6        | 67.6        |
| ELP [22]      | 72.8        | 70.8        | 72.0        | 59.6        | 66.7        | 63.3        | 77.8        | 69.0        |
| <b>DECOTA</b> | <b>79.1</b> | <b>74.9</b> | <b>76.9</b> | <b>65.1</b> | <b>72.0</b> | <b>69.7</b> | <b>79.6</b> | <b>73.9</b> |

Table 6: Accuracy on Office-Home (%) for the one-shot setting with four domains, using VGG-16.

| Method        | R to C      | R to P      | R to A      | P to R      | P to C      | P to A      | A to P      | A to C      | A to R      | C to R      | C to A      | C to P      | Mean        |
|---------------|-------------|-------------|-------------|-------------|-------------|-------------|-------------|-------------|-------------|-------------|-------------|-------------|-------------|
| S+T           | 39.5        | 75.3        | 61.2        | 71.6        | 37.0        | 52.0        | 63.6        | 37.5        | 69.5        | 64.5        | 51.4        | 65.9        | 57.4        |
| DANN [13]     | <b>52.0</b> | 75.7        | 62.7        | 72.7        | 45.9        | 51.3        | 64.3        | 44.4        | 68.9        | 64.2        | 52.3        | 65.3        | 60.0        |
| ENT [51]      | 23.7        | 77.5        | 64.0        | 74.6        | 21.3        | 44.6        | 66.0        | 22.4        | 70.6        | 62.1        | 25.1        | 67.7        | 51.6        |
| MME [51]      | 49.1        | 78.7        | 65.1        | 74.4        | 46.2        | 56.0        | 68.6        | 45.8        | 72.2        | 68.0        | 57.5        | 71.3        | 62.7        |
| UODA [45]     | 49.6        | 79.8        | <b>66.1</b> | 75.4        | 45.5        | <b>58.8</b> | <b>72.5</b> | 43.3        | <b>73.3</b> | 70.5        | <b>59.3</b> | 72.1        | <b>63.9</b> |
| ELP [22]      | 49.2        | 79.7        | 65.5        | 75.3        | 46.7        | 56.3        | 69.0        | <b>46.1</b> | 72.4        | 68.2        | 67.4        | 71.6        | 63.1        |
| <b>DECOTA</b> | 47.2        | <b>80.3</b> | 64.6        | <b>75.5</b> | <b>47.2</b> | 56.6        | 71.1        | 42.5        | 73.1        | <b>71.0</b> | 57.8        | <b>72.9</b> | 63.3        |

less, **DECOTA** attains the highest accuracy on 5 adaptation scenarios of Office-Home in the one-shot setting.

## B.2. Office-Home results on other backbones

We report the comparison with baselines on Office-Home using a ResNet-34 backbone in Table 7, following [26]<sup>3</sup>. **DECOTA** attains the state-of-the-art result.

## B.3. Results on Office-31

We report the comparison with available baseline results on Office-31 [50] in Table 8, using ResNet-34 backbone. Following [51], two adaptation scenarios are compared (Webcam to Amazon, DSLR to Amazon). Our approach **DECOTA** consistently outperforms the compared methods.

## B.4. Larger-shot results

We provide 10,20,50-shot SSDA results on DomainNet in Table 9. We randomly select and add additional samples per class from the target domain to the target labeled pool. As a semi-supervised setting, we compared with both domain adaptation (DA) and semi-supervised learning (SSL) baselines [59]. The implementation details are the same as those of 1,3-shot. **DECOTA** improves along with more shots and can outperform baselines.

<sup>3</sup>Most existing papers only reported Office-Home results using VGG-16. We followed [26] to further report ResNet-34. Some algorithms reported in Table 3 are missing in Table 7 since they do not release code.

## B.5. Numbers and accuracy of pseudo-labels

We showed the number of total and correct pseudo-labels by the two classifiers of **DECOTA** along the training iterations in Figure 3 (c) of the main paper. The analysis is on DomainNet three-shot setting, from Real to Clipart. Concretely, for every 1K iterations (*i.e.*, 24K unlabeled data), we accumulated the number of unlabeled data that have confident (with confidence  $> \tau = 0.5$ ) and correct predictions by at least one classifier. We further plot them independently for each classifier (*i.e.*,  $w_f$  and  $w_g$ ) in Fig. 6. The accuracy of pseudo-labels remains stable (*i.e.*, the number of confident and correct predictions divided by the number of confident predictions) but the number increases along training.

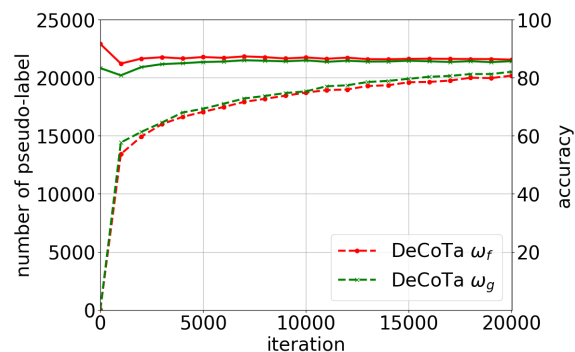

Figure 6: Number (dashed, left) and accuracy (solid, right) of pseudo-labels on DomainNet three-shot setting, Real to Clipart.

Table 7: Accuracy on Office-Home (%) for the three-shot setting with four domains, using ResNet-34.

| Method        | R to C      | R to P      | R to A      | P to R      | P to C      | P to A      | A to P      | A to C      | A to R      | C to R      | C to A      | C to P      | Mean        |
|---------------|-------------|-------------|-------------|-------------|-------------|-------------|-------------|-------------|-------------|-------------|-------------|-------------|-------------|
| S+T           | 55.7        | 80.8        | 67.8        | 73.1        | 53.8        | 63.5        | 73.1        | 54.0        | 74.2        | 68.3        | 57.6        | 72.3        | 66.2        |
| DANN [13]     | 57.3        | 75.5        | 65.2        | 69.2        | 51.8        | 56.6        | 68.3        | 54.7        | 73.8        | 67.1        | 55.1        | 67.5        | 63.5        |
| ENT [51]      | 62.6        | 85.7        | 70.2        | 79.9        | 60.5        | 63.9        | 79.5        | 61.3        | 79.1        | 76.4        | 64.7        | 79.1        | 71.9        |
| MME [51]      | 64.6        | 85.5        | 71.3        | 80.1        | 64.6        | 65.5        | 79.0        | 63.6        | 79.7        | 76.6        | 67.2        | 79.3        | 73.1        |
| APE [26]      | 66.4        | 86.2        | 73.4        | 82.0        | 65.2        | 66.1        | 81.1        | 63.9        | 80.2        | 76.8        | 66.6        | 79.9        | 74.0        |
| <b>DECOTA</b> | <b>70.4</b> | <b>87.7</b> | <b>74.0</b> | <b>82.1</b> | <b>68.0</b> | <b>69.9</b> | <b>81.8</b> | <b>64.0</b> | <b>80.5</b> | <b>79.0</b> | <b>68.0</b> | <b>83.2</b> | <b>75.7</b> |

Table 8: SSDA results on Office-31, on two scenarios (following [51]).

| Method    | Webcam (W) to Amazon (A) |             | DSLR (D) to Amazon (A) |             |
|-----------|--------------------------|-------------|------------------------|-------------|
|           | 1-shot                   | 3-shot      | 1-shot                 | 3-shot      |
| S+T       | 69.2                     | 73.2        | 68.2                   | 73.3        |
| DANN [13] | 69.3                     | 75.4        | 70.4                   | 74.6        |
| ENT [51]  | 69.1                     | 75.4        | 72.1                   | 75.1        |
| MME [51]  | 73.1                     | 76.3        | 73.6                   | 77.6        |
| Ours      | <b>76.0</b>              | <b>76.8</b> | <b>74.2</b>            | <b>78.3</b> |

### B.6. Task decomposition

We report the comparison of **DECOTA** and **MIST** on DomainNet and Office-Home in all the adaptation scenarios. As shown in Table 10, **DECOTA** outperform **MIST** on all the setting by 1 ~ 2% on DomainNet and 3 ~ 5% on Office-Home, which further confirms the effectiveness of task decomposition — explicitly considering the discrepancy between the two sources of supervision — in **DECOTA**.

### B.7. One-direction training

We further consider another variant of **DECOTA** named **one-direction teaching**, in which only one task teaches the other. Instead of co-training, we use either  $w_f$  or  $w_g$  to generate pseudo-labels for both tasks<sup>4</sup>, while keeping the other setups the same as **DECOTA**. This study is designed to measure the complementary specialties of the two tasks. As shown in Table 11, the performance drops notably by using one-direction teaching. The results suggest that the two tasks provide unique expertise and complement each other, instead of one dominating the other.

### B.8. Results on the source domain

We report the results on the source domain test set using  $w_f$  and  $w_g$  of **DECOTA** on DomainNet (three-shot) in Table 12. While  $w_f$  and  $w_g$  have similar accuracy on the target domain test set, the fact that  $w_f$  does not learn from  $D_S$  suggests their difference in classifying source domain data. Table 12 confirms this: we see that  $w_g$  clearly dominates  $w_f$ . Its accuracy is even on a par with a model trained only

<sup>4</sup>That is, **one-direction teaching** constructs both pseudo-label sets, *i.e.*,  $U^{(f)}$  and  $U^{(g)}$  in Equation 1 of the main text, by the same model (we hence have two versions,  $w_f$  teaching or  $w_g$  teaching).

on  $D_S$ , showing one advantage of **DECOTA**— the model can keep its discriminative ability on the source domain.

### B.9. Sensitivity to the confidence threshold $\tau$

We investigate **DECOTA**’s sensitivity to the confidence threshold  $\tau$  for assigning pseudo-labels (cf. Equation 1 and Equation 4 of the main paper). As shown in Fig. 7, the variance in accuracy is small when  $\tau \leq 0.7$ . The accuracy drops notably when  $\tau \geq 0.9$ . We surmise that it is due to too few pseudo-labeled data are picked under a high threshold.

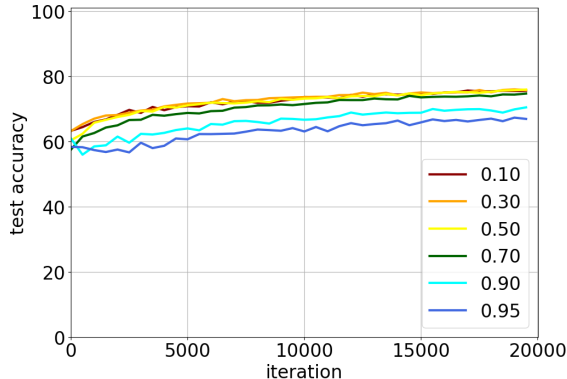

Figure 7: **DECOTA**’s sensitivity to pseudo-label threshold  $\tau$  on DomainNet three-shot setting, Real to Clipart.

### B.10. Analysis on the Beta distribution coefficient $\alpha$

Fig. 8 shows **DECOTA**’s sensitivity to the MIXUP hyperparameter  $\alpha$  in Equation 2 of the main paper:  $\alpha$  is the coefficient of the Beta distribution, which influences the sampled value of  $\lambda$ , an indicator of the “propotion” in the

MIXUP algorithm. We report **DECOTA**'s result on DomainNet three-shot setting, adapting from Real to Clipart. The best performance is achieved by  $\alpha = 1.0$ , equivalent to a uniform distribution of  $\lambda \in [0, 1]$ . This result is consistent with our hypothesis that MIXUP connects the source and target domains with interpolated feature spaces in-between.

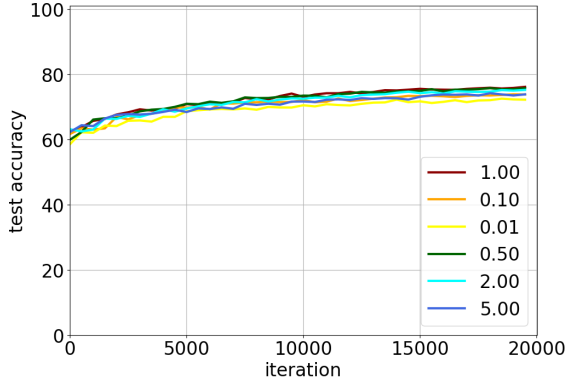

Figure 8: **DECOTA**'s sensitivity to the Beta distribution coefficient  $\alpha$  on DomainNet three-shot setting, Real to Clipart.

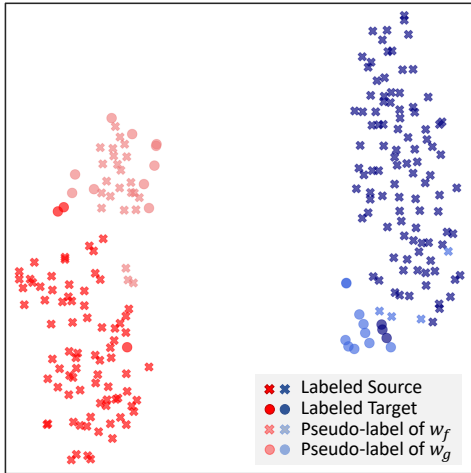

Figure 9: t-SNE visualization of pseudo-labels assigned by  $w_f$  and  $w_g$  in **DECOTA** (see text for details).

### B.11. Training time

**DECOTA** does not increase the training time much for two reasons. First, at each iteration (*i.e.*, mini-batch), it only updates and learns from the pseudo-labels of *the current mini-batch* of unlabeled data, not the entire unlabeled data. Second, assigning pseudo-labels only requires a forward pass of the mini-batch, just like most domain adaptation algorithms normally do to compute training losses. The only difference is that **DECOTA** trains two classifiers and needs to perform the forward pass of unlabeled data twice.

### B.12. t-SNE visualizations on DECOTA tasks

We visualize  $D_S$ ,  $D_T$ , and the  $D_U$  pseudo-labels by each task of **DECOTA** in Fig. 9. For clarity, we select two classes for illustration. The colors blue and red represent the two classes; the shapes circle and cross represent data from  $D_T$  (labeled target data) and  $D_S$  (labeled source data), respectively. The colors light blue and light red represent the pseudo-labels of each class on  $D_U$ , in which the shape circle indicates that the pseudo-labels are provided by  $w_f$  (learned with  $D_T$ ) and the shape cross indicates that the pseudo-labels are provided by  $w_g$  (learned with  $D_S$ ). The visualization is based on DomainNet three-shot setting, from Real to Clipart, trained for 10,000 iterations. We see that  $w_f$  tends to assign pseudo-labels to unlabeled data whose features are closer to  $D_T$ ;  $w_g$  tends to assign pseudo-labels to unlabeled data whose features are closer to  $D_S$ . Such a behavior is aligned with the seminal work of semi-supervised learning by [77].

Table 9: Results on DomainNet at 10, 20, 50-shot, using ResNet-34. We tune hyper-parameters for SSL methods similarly to DA methods.

| n-shot →      | R to C      |             |             | R to P      |             |             | P to C      |             |             | C to S      |             |             | S to P      |             |             | R to S      |             |             | P to R      |             |             | Mean        |             |             |
|---------------|-------------|-------------|-------------|-------------|-------------|-------------|-------------|-------------|-------------|-------------|-------------|-------------|-------------|-------------|-------------|-------------|-------------|-------------|-------------|-------------|-------------|-------------|-------------|-------------|
|               | 10          | 20          | 50          | 10          | 20          | 50          | 10          | 20          | 50          | 10          | 20          | 50          | 10          | 20          | 50          | 10          | 20          | 50          | 10          | 20          | 50          | 10          | 20          | 50          |
| S+T           | 69.1        | 72.4        | 77.5        | 67.3        | 70.2        | 73.4        | 68.2        | 72.5        | 77.7        | 62.9        | 67.3        | 71.8        | 64.8        | 67.9        | 72.6        | 61.3        | 65.5        | 70.2        | 78.0        | 79.3        | 82.2        | 67.4        | 70.7        | 75.1        |
| DANN [13]     | 66.2        | 68.0        | 71.1        | 65.1        | 67.1        | 69.0        | 62.4        | 64.5        | 68.2        | 60.0        | 62.4        | 66.8        | 61.3        | 63.8        | 67.6        | 61.4        | 63.2        | 66.9        | 71.6        | 74.7        | 78.1        | 64.0        | 66.2        | 69.7        |
| ENT [51]      | 77.9        | 80.0        | 83.0        | 72.3        | 74.9        | 77.7        | 77.5        | 79.1        | 82.3        | 66.3        | 70.1        | 75.0        | 66.3        | 71.0        | 75.7        | 63.9        | 68.3        | 74.6        | <b>81.2</b> | <b>82.9</b> | 84.5        | 72.2        | 75.2        | 79.0        |
| MME [51]      | 77.0        | 78.5        | 80.9        | 71.9        | 74.0        | 76.4        | 75.6        | 76.9        | 80.4        | 65.9        | 68.6        | 72.5        | 68.6        | 70.9        | 74.4        | 66.7        | 69.7        | 72.7        | 80.8        | 82.2        | 83.3        | 72.4        | 74.4        | 77.2        |
| Mixup [76]    | 73.4        | 79.5        | 83.1        | 68.3        | 72.2        | 75.4        | 75.0        | 79.5        | 83.1        | 63.7        | 69.4        | 75.0        | 68.5        | 72.4        | 76.2        | 62.9        | 69.9        | 75.0        | 78.8        | 82.3        | <b>84.7</b> | 70.1        | 75.0        | 78.9        |
| FixMatch [59] | 76.6        | 79.5        | 82.3        | 73.0        | 74.7        | 76.4        | 75.8        | 79.4        | 83.3        | 70.1        | 73.1        | 76.9        | 71.3        | 73.3        | 77.0        | 68.7        | 71.6        | 74.2        | 79.7        | 81.9        | 84.2        | 73.6        | 76.2        | 79.2        |
| <b>DECOTA</b> | <b>81.8</b> | <b>82.6</b> | <b>85.0</b> | <b>75.1</b> | <b>76.6</b> | <b>78.7</b> | <b>81.3</b> | <b>81.7</b> | <b>84.5</b> | <b>73.7</b> | <b>75.3</b> | <b>78.0</b> | <b>73.4</b> | <b>75.7</b> | <b>77.7</b> | <b>73.7</b> | <b>75.5</b> | <b>77.8</b> | 80.7        | 80.1        | 83.9        | <b>77.1</b> | <b>78.2</b> | <b>80.8</b> |

Table 10: Comparison between DECOTA and MIST: test accuracy on DomainNet and Office-Home dataset (%).

(a) DomainNet

| Setting | Method        | R to C | R to P | P to C | C to S | S to P | R to S | P to R | Mean |
|---------|---------------|--------|--------|--------|--------|--------|--------|--------|------|
| 1-shot  | <b>MIST</b>   | 74.8   | 73.6   | 74.5   | 65.0   | 72.0   | 67.0   | 77.6   | 72.1 |
|         | <b>DECOTA</b> | 79.1   | 74.9   | 76.9   | 65.1   | 72.0   | 69.7   | 79.6   | 73.9 |
| 3-shot  | <b>MIST</b>   | 78.1   | 75.2   | 76.7   | 68.3   | 72.6   | 71.5   | 79.8   | 74.6 |
|         | <b>DECOTA</b> | 80.4   | 75.2   | 78.7   | 68.6   | 72.7   | 71.9   | 81.5   | 75.6 |

(b) Office-Home

| Setting | Method        | R to C | R to P | R to A | P to R | P to C | P to A | A to P | A to C | A to R | C to R | C to A | C to P | Mean |
|---------|---------------|--------|--------|--------|--------|--------|--------|--------|--------|--------|--------|--------|--------|------|
| 1-shot  | <b>MIST</b>   | 42.7   | 77.5   | 62.9   | 73.1   | 39.4   | 54.8   | 67.1   | 40.0   | 66.9   | 67.9   | 56.8   | 69.4   | 59.9 |
|         | <b>DECOTA</b> | 47.2   | 80.3   | 64.6   | 75.5   | 47.2   | 56.6   | 71.1   | 42.5   | 73.1   | 71.0   | 57.8   | 72.9   | 63.3 |
| 3-shot  | <b>MIST</b>   | 54.7   | 81.2   | 64.0   | 69.4   | 51.7   | 58.8   | 69.1   | 47.6   | 70.6   | 65.3   | 60.8   | 73.8   | 63.9 |
|         | <b>DECOTA</b> | 59.9   | 83.9   | 67.7   | 77.3   | 57.7   | 60.7   | 78.0   | 54.9   | 76.0   | 74.3   | 63.2   | 78.4   | 69.3 |

Table 11: Comparison between DECOTA and one-direction teaching: accuracy on DomainNet (%) three-shot setting.

| Method         | R to C | R to P | P to C | C to S | S to P | R to S | P to R | Mean |
|----------------|--------|--------|--------|--------|--------|--------|--------|------|
| $w_f$ teaching | 73.8   | 67.2   | 73.7   | 63.1   | 65.9   | 61.7   | 78.2   | 69.1 |
| $w_g$ teaching | 77.5   | 74.5   | 74.2   | 64.8   | 71.6   | 69.0   | 79.0   | 72.9 |
| <b>DECOTA</b>  | 80.4   | 75.2   | 78.7   | 68.6   | 72.7   | 71.9   | 81.5   | 75.6 |

Table 12: Comparison on the source domain test data of DomainNet (%). Here we compare the two-task models of DECOTA in the three-shot setting to the source-only model (S).

| Method | R to C | R to P | P to C | C to S | S to P | R to S | P to R | Mean |
|--------|--------|--------|--------|--------|--------|--------|--------|------|
| $w_f$  | 55.2   | 68.2   | 43.8   | 59.5   | 50.8   | 56.9   | 61.0   | 56.3 |
| $w_g$  | 97.2   | 97.1   | 99.3   | 98.7   | 98.9   | 96.8   | 99.4   | 98.2 |
| S      | 98.1   | 98.2   | 99.5   | 98.9   | 99.2   | 98.2   | 99.6   | 98.8 |
